# Supplementary material for: Tumor-secreted exosomal miR-141 activates tumor-stroma interactions and controls premetastatic niche formation in ovarian cancer metastasis
Source: Springer Nature journal article supplement (doi:10.1186/s12943-022-01703-9), 2023-01-09
Supplement: MOESM1 [file 23903366]

Supplementary Table S1: Oligo sequences of plasmid cloning and qPCR.

|                                                 |                                                                |
|-------------------------------------------------|----------------------------------------------------------------|
| Luciferase reporter plasmid construct sequences |                                                                |
| YAP1 Wild Type Sense(52bp)                      | CAATTCAGAATTCATACCAATCAGTGTTGAAACTCAA<br>CATTGCAAAAAGT         |
| YAP1 Wild Type Antisense(58bp)                  | CTAGACTTTTGCAATGTTTGAGTTTCAACTGATTGG<br>TATGAATTCTGAATTGAGCT   |
| YAP1 Mutant Type Sense(52bp)                    | CAATTCAGAATTCATACCAATCCCTCTTGAAACTCAA<br>CATTGCAAAAAGT         |
| YAP1 Mutant Type Antisense(58bp)                | CTAGACTTTTGCAATGTTTGAGTTTCAAGAGGGATTG<br>GTATGAATTCTGAATTGAGCT |
|                                                 |                                                                |
| ChIP assay primers                              |                                                                |
| CBE1 Forward                                    | GGGACACTGTATTTGGTCTCC                                          |
| CBE1 Reverse                                    | CCTTTCGGTACTCAGGGT                                             |
| CBE2 Forward                                    | GAGCTCTGAATCCCACTTGG                                           |
| CBE2 Reverse                                    | GCCGGATCCACATAGAGTC                                            |
| CBE3 Forward                                    | GGGGCCCAATACTGAATACC                                           |
| CBE3 Reverse                                    | GCATAGCACATGACACCAGG                                           |
|                                                 |                                                                |
| Luciferase reporter plasmid constructed primers |                                                                |
| GROalpha CBE1-3 Forward                         | ACATGCTAGCACACCTTTCTAC                                         |
| GROalpha CBE2-3 Forward                         | TAAAGCTAGCAGGTAAATGAC                                          |
| GROalpha CBE3 Forward                           | TTTTCGCTAGCAAGGGGGCCCAA                                        |
| GROalpha CBEN Forward                           | ACTGACGCTAGCACTGGATTGAGC                                       |
| GROalpha CBE Reverse                            | AGTGGAAGCTTGCGCTGAAGATACCA                                     |
|                                                 |                                                                |
| CRISPR/Cas9 Knock-out sgRNA                     |                                                                |
| YAP1 Sense                                      | CACCGGACTCGGAGACCGACCTGG                                       |
| YAP1Antisense                                   | AAACCCAGGTCGGTCTCCGAGTCCC                                      |
| TAZ Sense                                       | CACCGGAGATGGCGTCTACCAGAAG                                      |
| TAZ Antisense                                   | AAACCTTCTGGTAGACGCCATCTCC                                      |
|                                                 |                                                                |
| CRISPRi sgRNA                                   |                                                                |
| Cxcr1 Sense1                                    | CACCGACCCAGCTGGTGCCTCAGGT                                      |
| Cxcr1 Antisense1                                | AAACACCTGAGGCACCAGCTGGGTC                                      |
| Cxcr1 Sense2                                    | CACCGGTACGCAACTCTGACTTCCT                                      |
| Cxcr1 Antisense2                                | AAACAGGAAGTCAGAGTTGCGTACC                                      |
| Cxcr1 Sense3                                    | CACCGCTGGGTCCGTTCTTGTGTG                                       |
| Cxcr1 Antisense3                                | AAACCACACAAGGAACGGACCCAGC                                      |
| Cxcr2 Sense1                                    | CACCGGTCGTAGAACTACTGCAGGT                                      |
| Cxcr2 Antisense1                                | AAACACCTGCAGTAGTTCTACGACC                                      |

|                  |                           |
|------------------|---------------------------|
| Cxcr2 Sense2     | CACCGATGCGTCATGCCGCTTCCCA |
| Cxcr2 Antisense2 | AAACTGGGAAGCGGCATGACGCATC |
| Cxcr2 Sense3     | CACCGGACGCTGTTTGTGAGCAGAG |
| Cxcr2 Antisense3 | AAACCTCTGCTCACAAACAGCGTCC |

|                          |                |     |      |   |                                      |                                           |
|--------------------------|----------------|-----|------|---|--------------------------------------|-------------------------------------------|
| TEAD1_TFBS_binding sites |                |     |      |   |                                      |                                           |
| TEAD1_HUMAN.H10 MO.D     | CXCL1(-2k~+2k) | 68  | 81   | + | Forward:<br>GGGACTGTATTTGGT<br>CTCC  |                                           |
| \                        |                |     |      |   | Reverse:<br>CCTTCGGTTACTCAGG<br>GGT  | from -1933 to -1920<br>AACATTCTAGC<br>ACA |
|                          |                |     |      |   |                                      |                                           |
|                          |                |     |      |   |                                      |                                           |
| TEAD1_HUMAN.H10 MO.D     | CXCL1(-2k~+2k) | 861 | 874  | + | Forward:<br>GAGCTCTGAATCCCACT<br>TGG |                                           |
|                          |                |     |      |   | Reverse:<br>GCCGGATCCCACATAG<br>AGTC | from -1140 to -1127<br>GAAATTCCTGA<br>GAG |
|                          |                |     |      |   |                                      |                                           |
|                          |                |     |      |   |                                      |                                           |
| TEAD1_HUMAN.H10 MO.D     | CXCL1(-2k~+2k) | 989 | 1002 | + | Forward:<br>GGGGCCAATACTGAA<br>TACC  |                                           |
|                          |                |     |      |   | Reverse:<br>GCATAGCACATGACACC<br>AGG | from -1012 to -999<br>TGCATGTCTGCT<br>GC  |
