# Supplementary material for: Tumor-secreted exosomal miR-141 activates tumor-stroma interactions and controls premetastatic niche formation in ovarian cancer metastasis
Source: Springer Nature journal article supplement (doi:10.1186/s12943-022-01703-9), 2023-01-09
Supplement: MOESM2 [file 23903366]

|                         |                    |      |      |   |             |              |           |                    |                         |              |              |                                                                                                                                                                                                   |
|-------------------------|--------------------|------|------|---|-------------|--------------|-----------|--------------------|-------------------------|--------------|--------------|---------------------------------------------------------------------------------------------------------------------------------------------------------------------------------------------------|
| TEAD1_HUMAN.<br>H10MO.D | CXCL1(-<br>2k~+2k) | 1908 | 1921 | - | 7.32<br>609 | 0.000<br>758 | 0.8<br>18 | GGAGTTCCA<br>GATCG | chr4:<br>74,735,<br>110 | 74735<br>017 | 74735<br>030 | <a href="https://genome.ucsc.edu/cgi-bin/hgTracks?db=hg19&amp;position=chr4:74735017-74735030">https://genome.ucsc.edu/cgi-<br/>bin/hgTracks?db=hg19&amp;position=chr4:747<br/>35017-74735030</a> |
| TEAD1_HUMAN.<br>H10MO.D | CXCL1(-<br>2k~+2k) | 3688 | 3701 | - | 7.18<br>478 | 0.000<br>816 | 0.8<br>18 | AACATTTTAG<br>TTCT | chr4:<br>74,735,<br>110 | 74736<br>797 | 74736<br>810 | <a href="https://genome.ucsc.edu/cgi-bin/hgTracks?db=hg19&amp;position=chr4:74736797-74736810">https://genome.ucsc.edu/cgi-<br/>bin/hgTracks?db=hg19&amp;position=chr4:747<br/>36797-74736810</a> |
| TEAD1_HUMAN.<br>H10MO.D | CXCL1(-<br>2k~+2k) | 1073 | 1086 | - | 7.17<br>391 | 0.000<br>821 | 0.8<br>18 | ACCATTCCTG<br>GTTC | chr4:<br>74,735,<br>110 | 74734<br>182 | 74734<br>195 | <a href="https://genome.ucsc.edu/cgi-bin/hgTracks?db=hg19&amp;position=chr4:74734182-74734195">https://genome.ucsc.edu/cgi-<br/>bin/hgTracks?db=hg19&amp;position=chr4:747<br/>34182-74734195</a> |
| TEAD1_HUMAN.<br>H10MO.D | CXCL1(-<br>2k~+2k) | 1048 | 1061 | - | 6.79<br>348 | 0.000<br>997 | 0.9<br>35 | TGCATAGCAC<br>ATGA | chr4:<br>74,735,<br>110 | 74734<br>157 | 74734<br>170 | <a href="https://genome.ucsc.edu/cgi-bin/hgTracks?db=hg19&amp;position=chr4:74734157-74734170">https://genome.ucsc.edu/cgi-<br/>bin/hgTracks?db=hg19&amp;position=chr4:747<br/>34157-74734170</a> |
