# Supplementary material for: Tumor-secreted exosomal miR-141 activates tumor-stroma interactions and controls premetastatic niche formation in ovarian cancer metastasis
Source: Springer Nature journal article supplement (doi:10.1186/s12943-022-01703-9), 2023-01-09
Supplement: MOESM3 [file 23903366]

**Supplementary Figures:**

**Tumor-secreted exosomal miR-141 activates tumor-stroma interactions and controls premetastatic niche formation in ovarian cancer metastasis**

Yulan Mo<sup>1</sup>, Leanne L Leung<sup>1</sup>, Celia SL Mak<sup>1</sup>, Xueyu, Wang<sup>1</sup>, Wai-Sun Chan<sup>1</sup>, Lynn MN Hui<sup>1</sup>, Hermit WM Tang<sup>1</sup>, Michelle KY Siu<sup>1</sup>, Rakesh Sharma<sup>2</sup>, Dakang Xu<sup>3</sup>, Stephen KW Tsui<sup>4</sup>, Hextan YS Ngan<sup>1</sup>, Mingo MH Yung<sup>1,\*</sup>, Karen KL Chan<sup>1,\*</sup> and David W Chan<sup>1,4,5,\*</sup>

<sup>1</sup> Department of Obstetrics & Gynaecology, LKS Faculty of Medicine, The University of Hong Kong, Hong Kong SAR, China

<sup>2</sup> Centre for PanorOmic Sciences Proteomics and Metabolomics Core, Li Ka Shing Faculty of Medicine, The University of Hong Kong, Hong Kong SAR, China

<sup>3</sup> Faculty of Medical Laboratory Science, Ruijin Hospital, School of Medicine, Shanghai Jiao Tong University, Shanghai 200030, China

<sup>4</sup> School of Biomedical Sciences, The Chinese University of Hong Kong, Hong Kong SAR, China

<sup>5</sup> School of Medicine, The Chinese University of Hong Kong-Shenzhen, Shenzhen, 518172, China

\*Correspondence: Dr. David W Chan, e-mail: [dwchan@hku.hk](mailto:dwchan@hku.hk), or [dwchan@cuhk.edu.cn](mailto:dwchan@cuhk.edu.cn); and [Dr. Karen KL Chan, e-mail: kklchan@hku.hk](mailto:kklchan@hku.hk); and [Dr. Mingo MH Yung, e-mail: h1094157@connect.hku.hk](mailto:h1094157@connect.hku.hk)

**A**

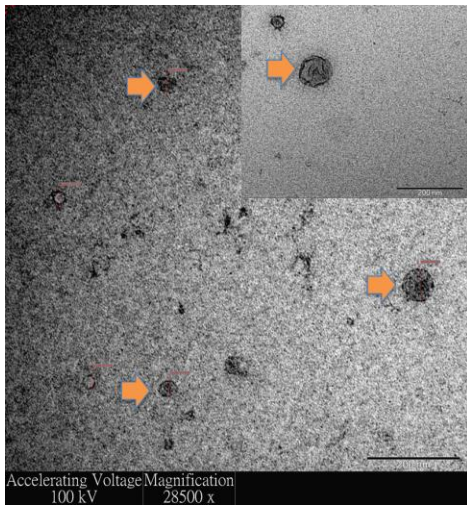

**B**

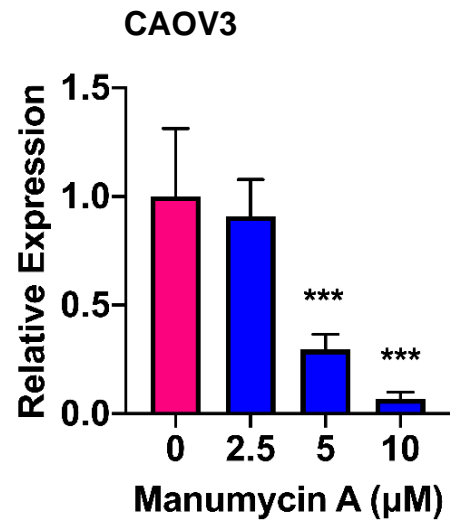

**C**

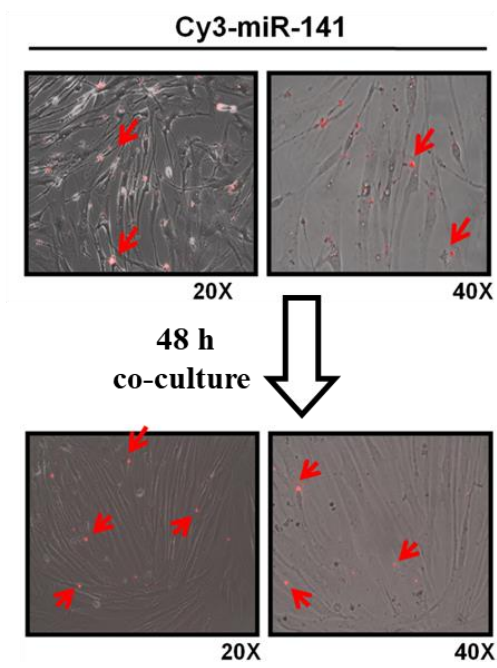

**Supplementary Figure S1. *MiR-141 is an exosomal miRNA derived from ovarian cancer cells***

- (A) Electron microscope images of exosomes found in the CM of ovarian cancer cells. Scale bar = 200nm.
- (B) Co-treatment of Manumycin-A, a specific inhibitor of exosome biogenesis, in CAOV3 cells for 3 days showed a dose-dependent reduction of secreted miR-141 in the conditioned medium (CM) (n = 3, mean  $\pm$  SEM, t-test, \*\*\* $P < 0.001$ ).
- (C) Fluorescent microscopies showed that Cy-3 labeled miR-141 was transfected to stromal fibroblast T HESCs and transferred between cells (Magnification 20x and 40x).

**A**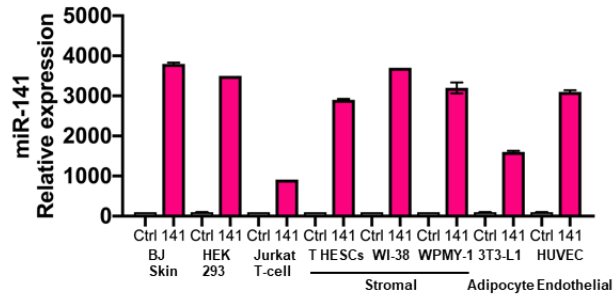**B**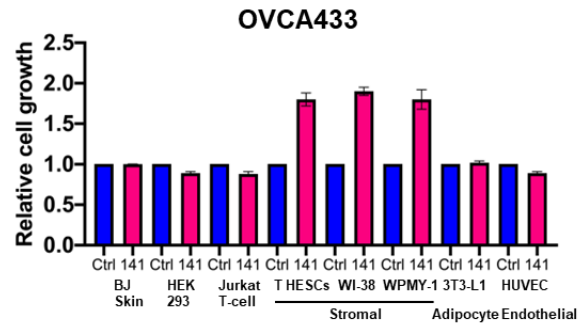**C**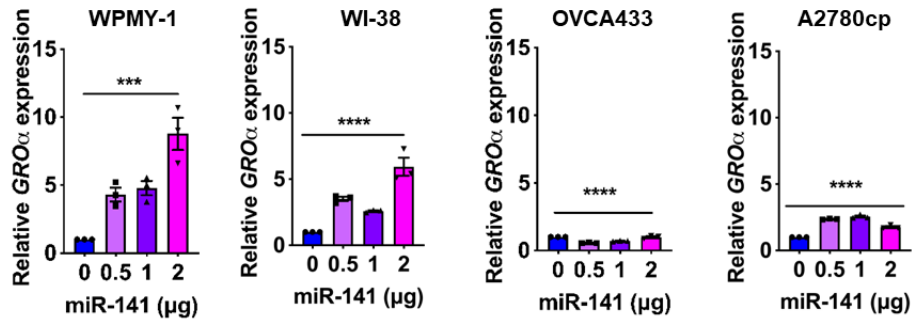**D**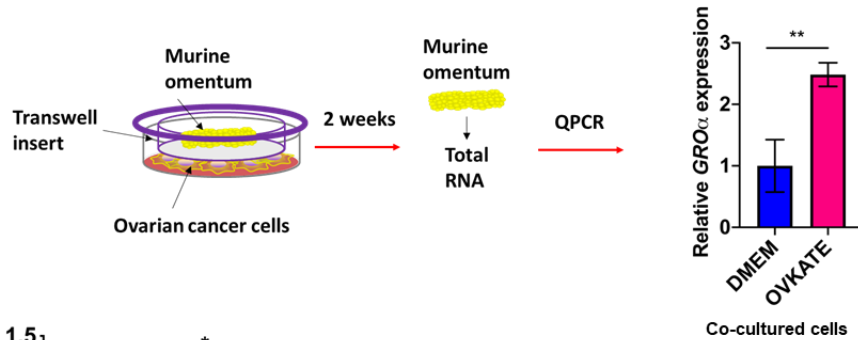**E**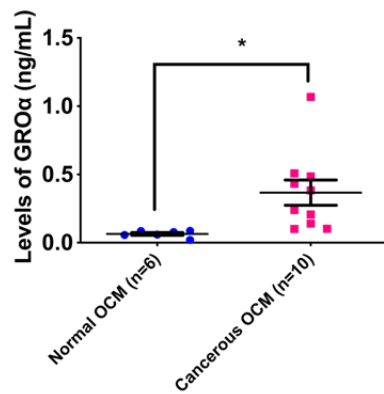

**Supplementary Figure S2. *MiR-141 induces stromal fibroblasts to have CAF-like properties***

- (A) QPCR analysis of the transfection efficiency of pmR-ZsGreen1-miR-141 and pmR-ZsGreen1 (vector control) in a panel of non-cancer cell lines such as BJ, HEK293, Jurkat T-cell, T HESCs, WI-38, WPMY-1, 3T3-L1 and HUVEC cells (n = 3, mean  $\pm$  SD).
- (B) XTT cell proliferation assays showed the relative cell growth of OVCA433 cells upon a 5-day co-culture of CM from the above miR-141 overexpression cells and the respective vector control cells (n = 3, mean  $\pm$  SD).
- (C) QPCR analysis of the relative *GRO $\alpha$*  expression in two human stromal cell lines (WPMY-1 and WI-38) and two ovarian cancer cell lines (OVCA433 and A2780cp) transfected with miR-141 overexpressing plasmid (0, 0.5, 1 and 2  $\mu$ g) for 2 days (mean  $\pm$  SEM, one-way ANOVA, \* $P$ <0.05, \*\* $P$ <0.01, \*\*\* $P$ <0.001, \*\*\*\* $P$ <0.0001).
- (D) Schematic diagram and qPCR analysis indicated the workflow and the relative expression of *GRO $\alpha$*  in the murine omentum co-cultured with OVKATE cells for two weeks in a Transwell insert (n = 3, mean  $\pm$  SEM, t-test, \*\* $P$ <0.01).
- (E) Graphic chart showed the relative expression of *GRO $\alpha$*  in normal OCM (n = 6) and cancerous OCM (n = 10) by ELISA (mean  $\pm$  SEM, t-test, \* $P$ <0.05).

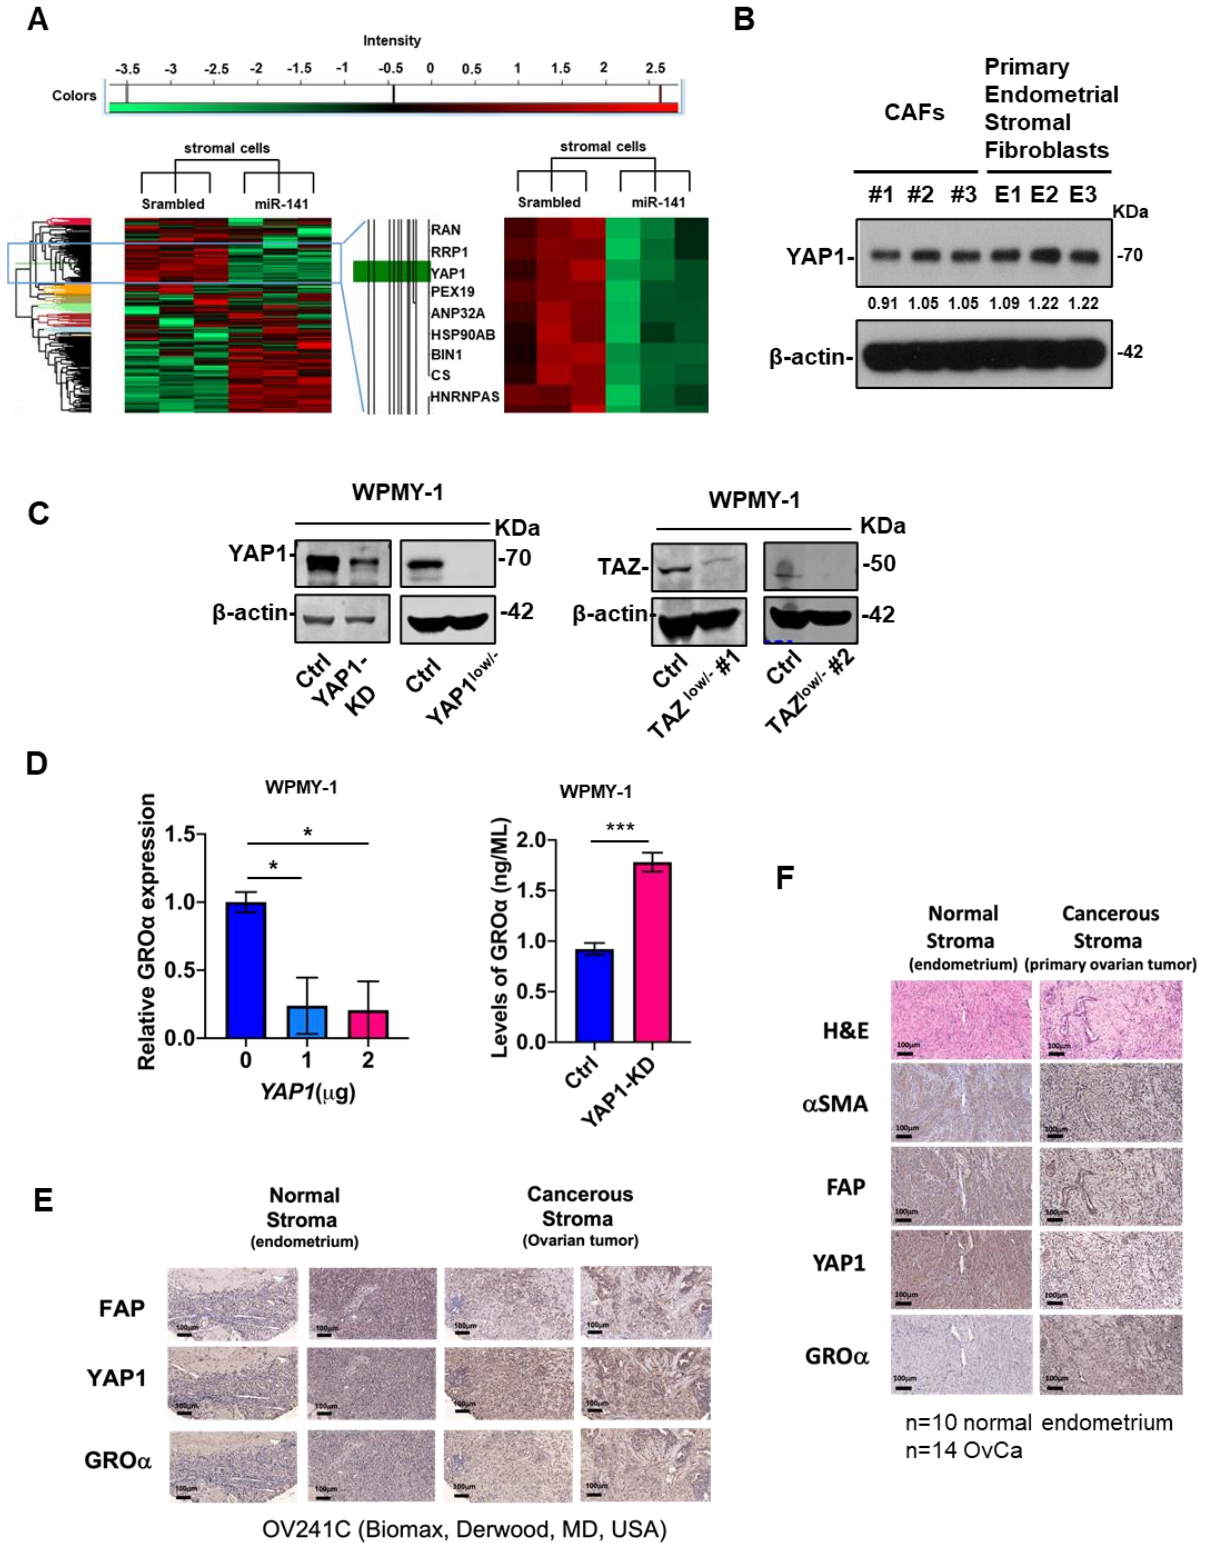

**Supplementary Figure S3. *GRO $\alpha$*  is the major proinflammatory chemokine in miR-141-expressing stroma**

- (A) Heatmap generated from LC-MS/MS proteomic analysis on WPMY-1 stromal fibroblasts with stable transfection of miR-141 showed YAP1 was a target of miR-141.
- (B) Western blot analysis compared the expression of YAP1 between the CAFs extracted from the OvCa patients and the primary endometrial stromal fibroblasts. The Relative YAP1 expression (YAP1/ $\beta$ -actin) was quantified by ImageJ software.
- (C) Western blot analysis showed the expression of YAP1 (left) and TAZ (right) in WPMY-1 cells with stable knockdown of YAP1 using shRNA (YAP1-KD), clones of CRISPR/Cas9-mediated gene knockout of YAP1 (YAP1<sup>low/-</sup>), and TAZ (TAZ<sup>low/-</sup> #1 and TAZ<sup>low/-</sup> #2).
- (D) Bar charts showed the qPCR analysis of the relative expression of *GRO $\alpha$*  in WPMY-1 cells with transient transfection of YAP1 expressing plasmid (0  $\mu$ g, 1  $\mu$ g and 2  $\mu$ g) (left) and the ELISA outcome on the relative expression of *GRO $\alpha$*  in WPMY-1 cells with or without YAP1 stably knockdown (right) (n = 3, mean  $\pm$  SEM, t-test, \* $P$ <0.05, \*\*\* $P$ <0.001).
- (E) The immunohistochemical analysis examined the relative expression of YAP1 and *GRO $\alpha$*  between the normal stroma of endometrium and cancerous stroma of ovarian tumor in a commercial OvCa tissue microarray, OV241C (Biomax, Derwood, MD, USA). FAP was used as the stromal marker. Scale bar = 100  $\mu$ m.
- (F) Immunohistochemical analysis of the relative expression of YAP1 and *GRO $\alpha$*  between the normal stroma of endometrium (n = 10) and cancerous stroma of primary ovarian tumor (n = 14).  $\alpha$ SMA and FAP were used as stromal markers. Scale bar = 100  $\mu$ m.

**A**

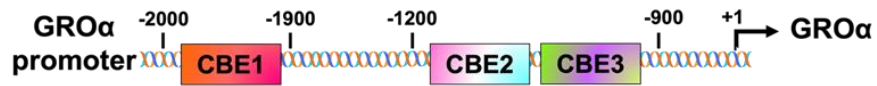

**B**

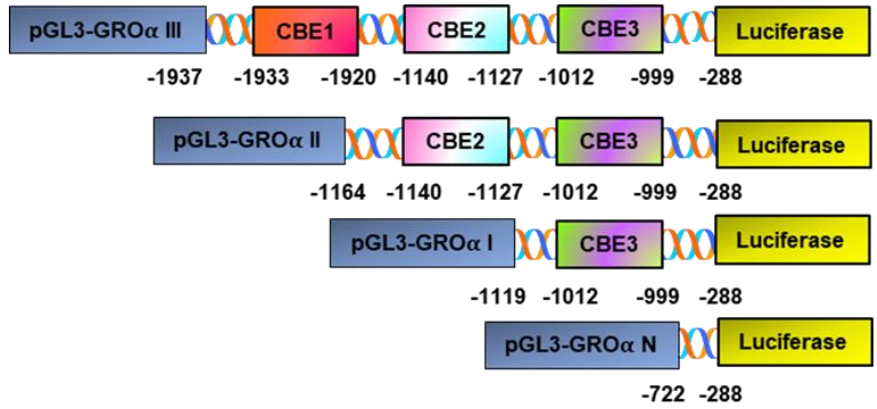

**C**

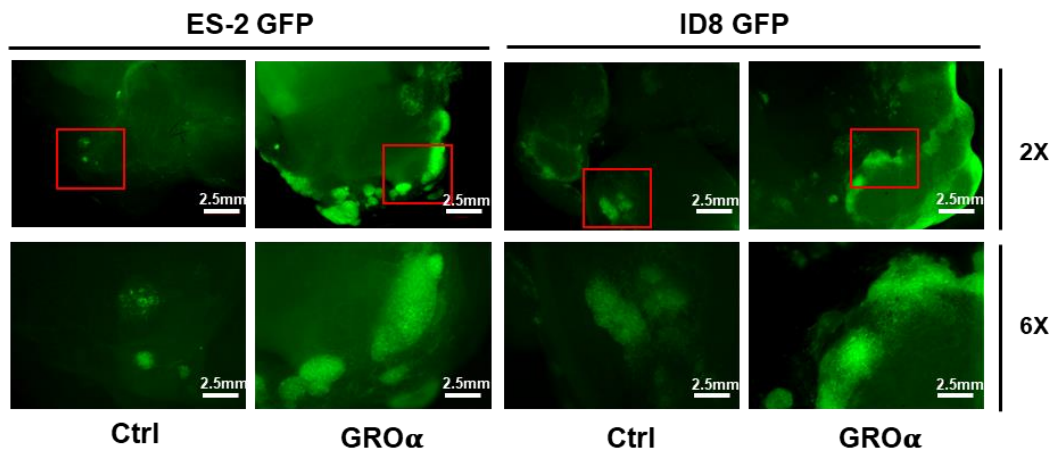

**D**

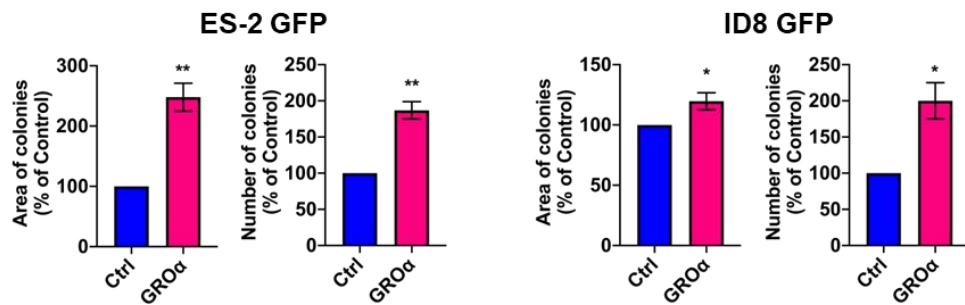



**Supplementary Figure S4. *YAP1* of Hippo signaling is the direct target of miR-141**

- (A) Schematic diagrams of on GRO $\alpha$  promoter which includes three predicted binding sites of TEAD (CBE1, CBE2, and CBE3).
- (B) Schematic diagrams of the luciferase reporter plasmids containing the full-length and truncated GRO $\alpha$  promoter.
- (C) The fluorescent microscopy showed colony formation by GFP-labeled ES-2 and ID8 cells (ES-2 GFP and ID8 GFP) on the respective co-cultured murine omentum supplemented with or without human GRO $\alpha$  recombinant protein (60 ng/mL). Scale bar = 2.5mm.
- (D) The bar charts plotted the area and number of the colonies formed by ES-2 GFP and ID8 GFP on the respective co-cultured murine omentum supplemented with or without human GRO $\alpha$  recombinant protein (60 ng/mL) (mean  $\pm$  SEM, t-test, \* $P$ <0.05, \*\* $P$ <0.01).

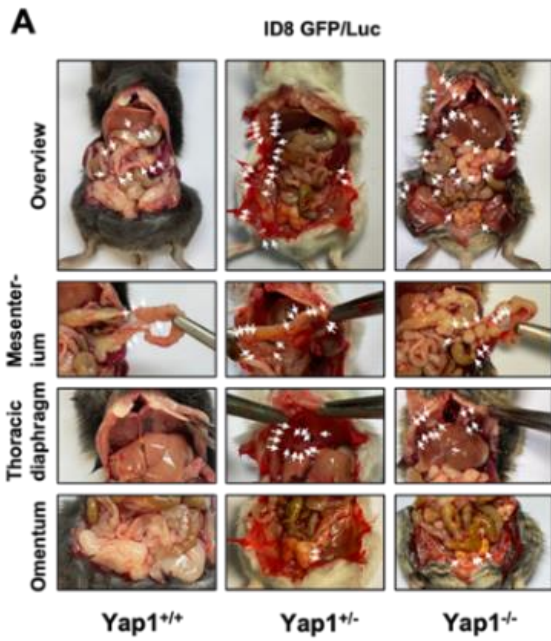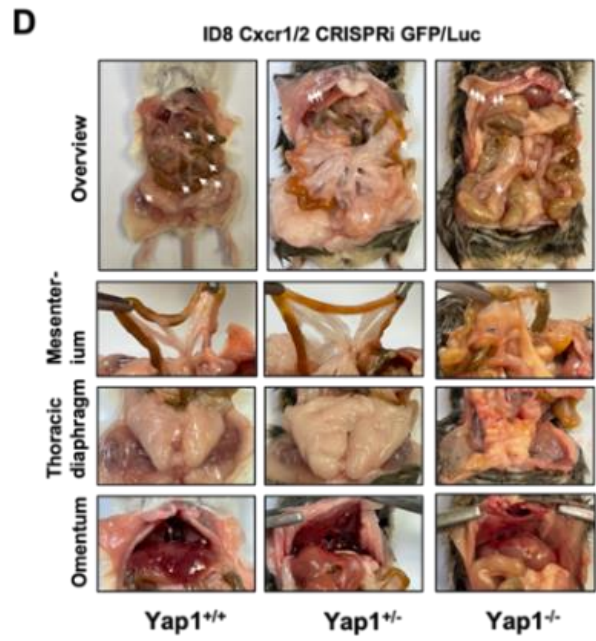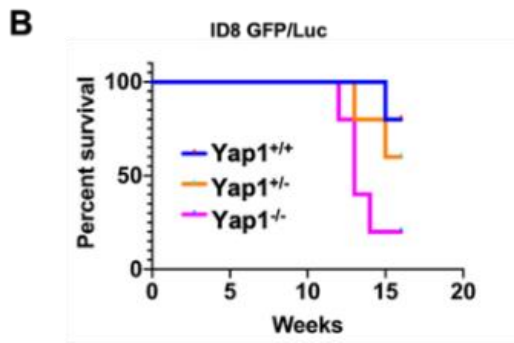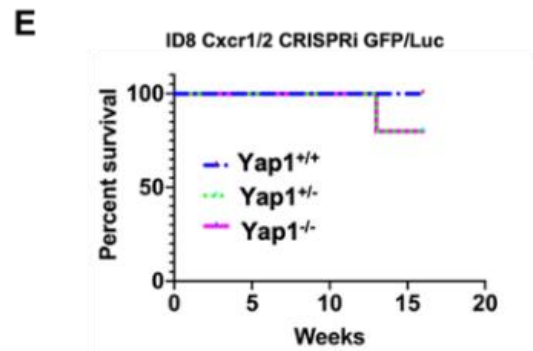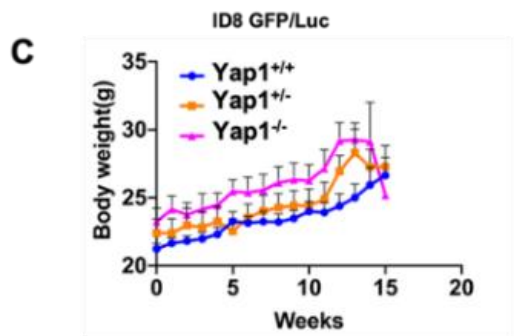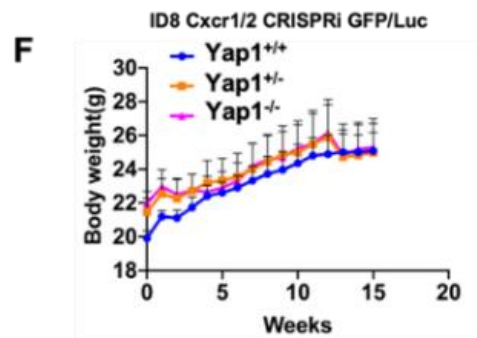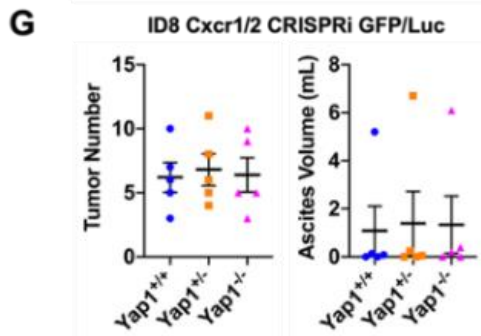

**Supplementary Figure S5. Conditional knockout (cKO) of Yap1 in stroma promotes tumor dissemination**

- (A) The images displayed the tumor formation and dissemination in the stromal-specific Yap1 cKO mice (Yap1<sup>+/-</sup> and Yap1<sup>-/-</sup>) and WT Yap1<sup>+/+</sup> mice upon intraperitoneal injection of GFP/Luciferase-labelled ID8 cells (ID8 GFP/Luc).
- (B) Kaplan-Meier survival curves of overall survival analysis on Yap1<sup>+/+</sup>, Yap1<sup>+/-</sup> and Yap1<sup>-/-</sup> mice after intraperitoneal injection with ID8 GFP/Luc cells (Yap1<sup>+/+</sup>/Yap1<sup>+/-</sup>: HR = 0.4310 (0.04456 ~ 4.170),  $P = 0.4593$ ; Yap1<sup>+/+</sup>/Yap1<sup>-/-</sup>: HR = 0.1457 (0.02368 ~ 0.8970),  $P = 0.0330$ ).
- (C) Bodyweight of Yap1<sup>+/+</sup>, Yap1<sup>+/-</sup> and Yap1<sup>-/-</sup> mice upon intraperitoneal injection of ID8 GFP/Luc cells.
- (D) The images displayed the tumor formation and dissemination in the stromal-specific Yap1 cKO mice (Yap1<sup>+/-</sup> and Yap1<sup>-/-</sup>) and WT Yap1<sup>+/+</sup> mice upon intraperitoneal injection of GFP/Luc-labelled ID8 Cxcr1/2 CRISPRi cells.
- (E) Kaplan-Meier survival curves of overall survival analysis on Yap1<sup>+/+</sup>, Yap1<sup>+/-</sup> and Yap1<sup>-/-</sup> mice after intraperitoneal injection with GFP/Luc-labelled ID8 Cxcr1/2 CRISPRi cells. (Yap1<sup>+/+</sup>/Yap1<sup>+/-</sup>: HR = 0 (-1.000 ~ -1.000),  $P = 0.3173$ ; Yap1<sup>+/+</sup>/Yap1<sup>-/-</sup>: HR = 0.000 (-1.000 ~ -1.000),  $P = 0.3173$ ).
- (F) Bodyweight of Yap1<sup>+/+</sup>, Yap1<sup>+/-</sup> and Yap1<sup>-/-</sup> mice upon intraperitoneal injection of GFP/Luc-labelled ID8 Cxcr1/2 CRISPRi cells.
- (G) Dot plots showed the tumor number and ascites volume among Yap1<sup>+/+</sup>, Yap1<sup>+/-</sup> and Yap1<sup>-/-</sup> mice after intraperitoneal injection with ID8 Cxcr1/2 CRISPRi GFP/Luc (n = 5, mean  $\pm$  SEM).

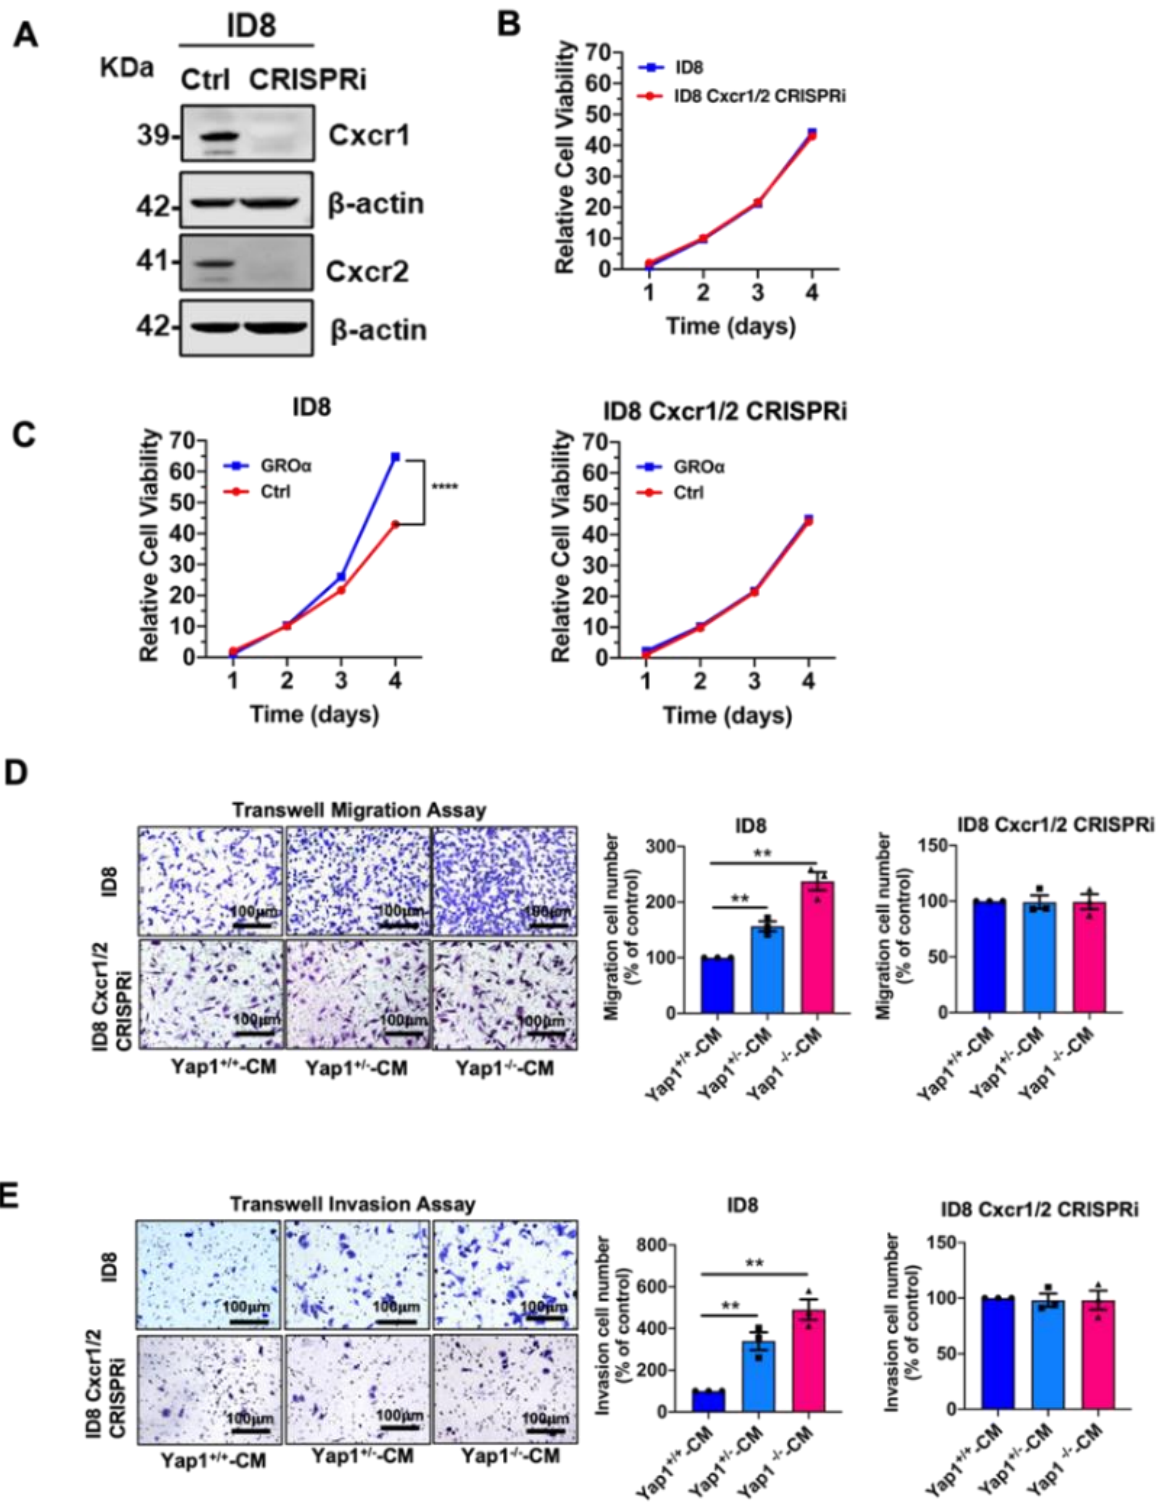

**Supplementary Figure S6. Depletion of CXCR1/2 impairs the oncogenic potential of OvCa cells induced by GRO $\alpha$ -enriched CM.**

- (A) Western blot analysis compared the expression level of Cxcr1 and Cxcr2 in ID8 CRISPRi cells with ID8 parental cells (Ctrl).
- (B) XTT cell proliferation assays indicated the relative cell growth of ID8 and ID8 Cxcr1/2 CRISPRi cells (n = 6, mean  $\pm$  SEM, 2way ANOVA, \* $P$ <0.05). N = 3 independent experiments.
- (C) XTT cell proliferation assays indicated the relative cell growth of ID8 and ID8 Cxcr1/2 CRISPRi cells treated with recombinant GRO $\alpha$  (n = 6, mean  $\pm$  SEM, 2way ANOVA, \*\*\*\* $P$ <0.0001). N = 3 independent experiments.
- (D) Transwell migration assay showed that the CM from the stromal-specific Yap1 cKO mice (Yap1<sup>+/-</sup>-CM and Yap1<sup>-/-</sup>-CM) significantly promoted higher cell migration capacities in ID8 parental cells than ID8 Cxcr1/2 CRISPRi cells as compared with their respective control using CM from WT Yap1<sup>+/+</sup> mice (n = 3, mean  $\pm$  SEM, t-test, \*\* $P$ <0.01, \*\*\* $P$ <0.001). N = 3 independent experiments.
- (E) Transwell invasion assay shows the mouse stromal CM from Yap1 cKO mice (Yap1<sup>+/-</sup>-CM and Yap1<sup>-/-</sup>-CM) promote more ID8 invasion capacities than ID8 Cxcr1/2 CRISPRi, Yap1<sup>+/+</sup>-CM was used as control ) (n = 3, mean  $\pm$  SEM, t-test, \*\* $P$ <0.01, \*\*\* $P$ <0.001). N = 3 independent experiments.
